# Supplementary material for: Involvement of mental health professionals in the treatment of tuberous sclerosis complex–associated neuropsychiatric disorders (TAND): results of a multinational European electronic survey
Source: Orphanet J Rare Dis. 2021 May 12;16:216. doi: 10.1186/s13023-021-01800-w (PMC8117562; doi:10.1186/s13023-021-01800-w)
Supplement: Supplementary file 6 — Additional file 6. Fig. S1: Country of residence of HCPs. [file 13023_2021_1800_MOESM6_ESM.docx]

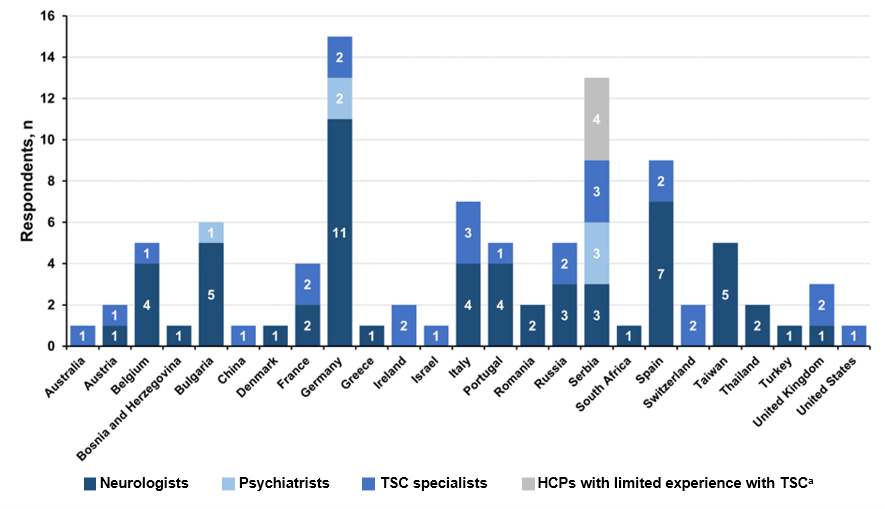


- **Fig. S1** Country of residence of HCPs. HCPs, healthcare providers; TSC, tuberous sclerosis complex. aHCPs with limited experience with TSC refer mainly to primary care physicians.
